# Supplementary material for: A multi-functional light-driven actuator with an integrated temperature-sensing function based on a carbon nanotube composite
Source: Royal Society of Chemistry journal article supplement (doi:10.1039/d0nr09210j), 2021-01-01
Supplement: d0nr09210j1.pdf [file d0nr09210j1.pdf]

## Supporting Information

### **A multi-functional light-driven actuator with an integrated temperature-sensing function based on a carbon nanotube composite**

Yiwen Xiao<sup>a,b</sup>, Jian Lin<sup>a,b</sup>, Jing Xiao<sup>a,b</sup>, Mingcen Weng<sup>c</sup>, Wei Zhang<sup>a,b,\*</sup>, Peidi Zhou<sup>a,b</sup>,  
Zhiling Luo<sup>a,b</sup> and Luzhuo Chen<sup>a,b,\*</sup>

<sup>a</sup> Fujian Provincial Key Laboratory of Quantum Manipulation and New Energy Materials, College of Physics and Energy, Fujian Normal University, Fuzhou, 350117, China.

<sup>b</sup> Fujian Provincial Collaborative Innovation Center for Advanced High-Field Superconducting Materials and Engineering, Fuzhou, 350117, China.

<sup>c</sup> School of Materials Science and Engineering, Fujian University of Technology, Fuzhou, 350118, China.

\*E-mail: ChenLZ@fjnu.edu.cn (L. Chen), wzhang721@163.com (W. Zhang)

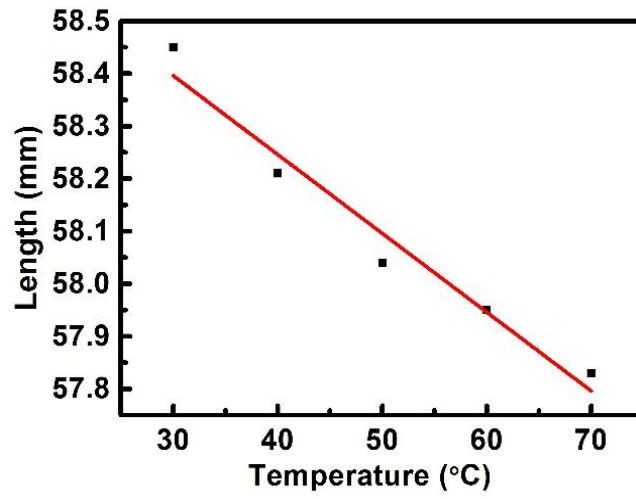

Fig. S1. Length change of the MC film as a function of temperature.

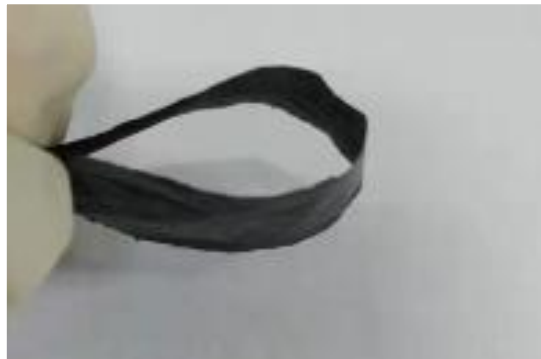

Fig. S2. Optical photo of the flexible and self-supporting CNT-MC film.

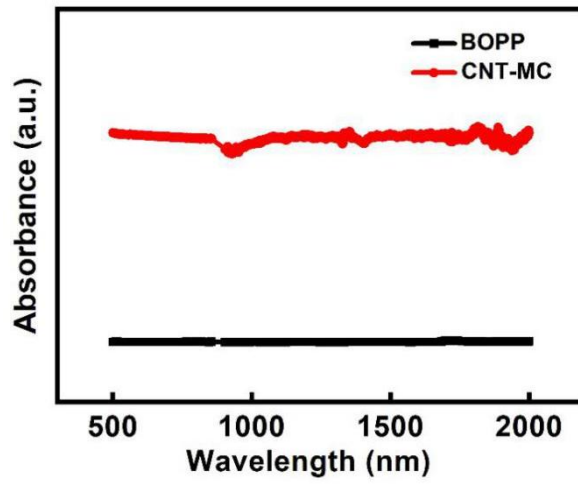

Fig. S3. Absorbance spectra of the CNT-MC film and BOPP film in the wavelength range from 500 to 2000 nm.

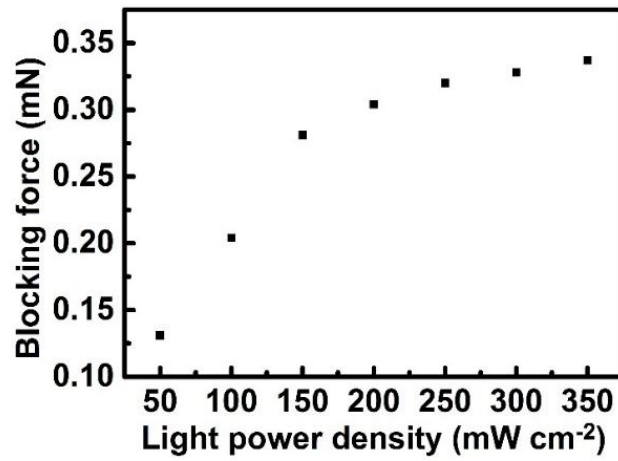

Fig. S4. Blocking force of the CNT-MC/BOPP actuator as a function of light power density.

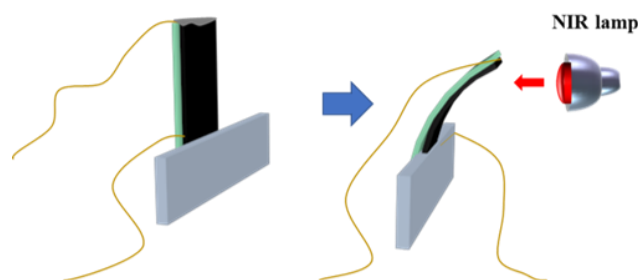

Fig. S5. Schematic diagram of testing the sensing performance of the CNT-MC/BOPP actuator

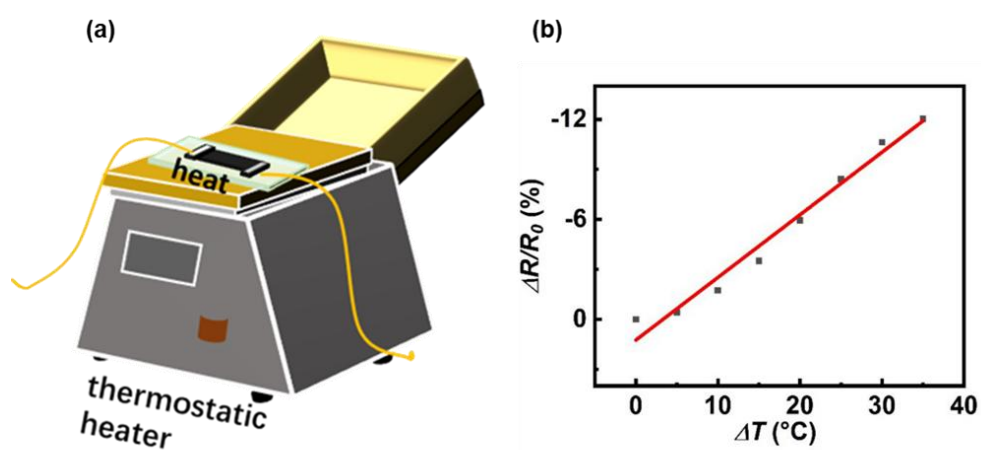

Fig. S6. (a) Schematic diagram of testing the sensing performance of device on a thermostatic heater; (b) Relative resistance change of the CNT-MC film as a function of temperature change.

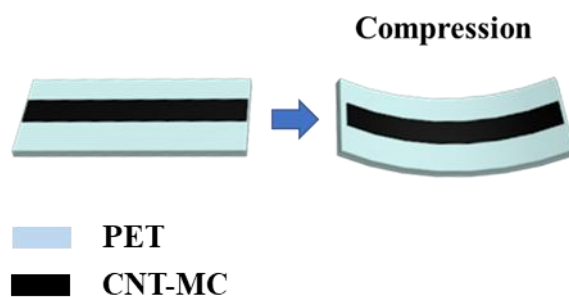

Fig. S7. Schematic diagram of the strain test for the CNT-MC film.

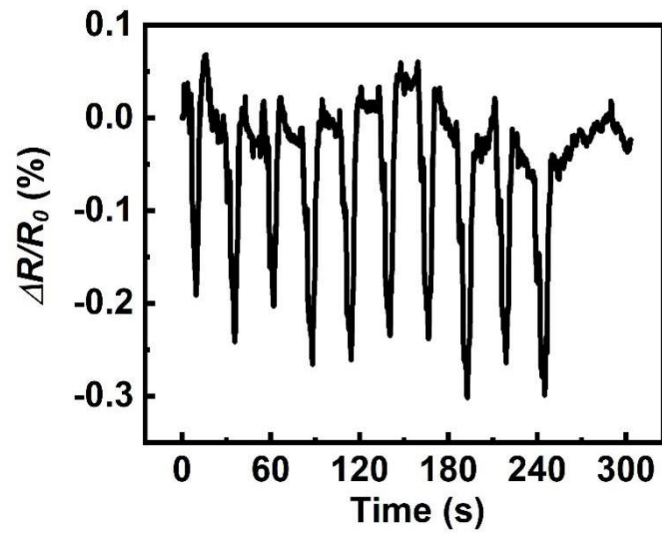

Fig. S8. The relative resistance change of CNT-MC film under strain.

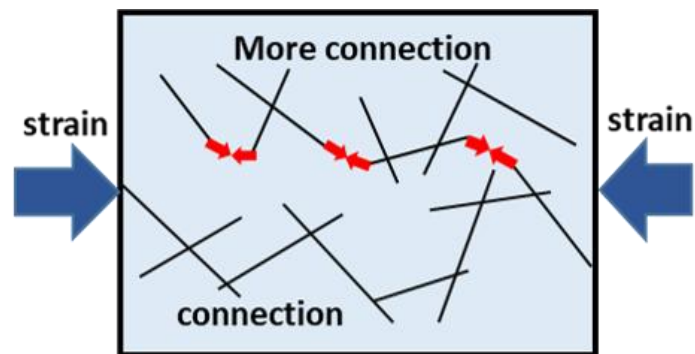

Fig. S9. Schematic diagram of the mechanism of strain induced resistance change.

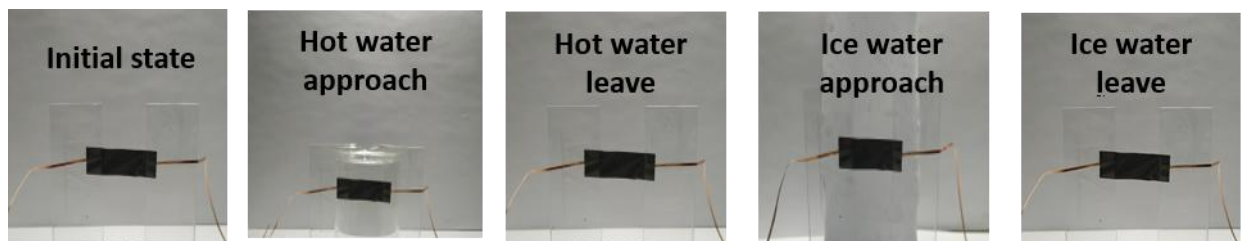

Figure. S10. Optical photos of the tests for the CNT-MC film as a temperature sensor.

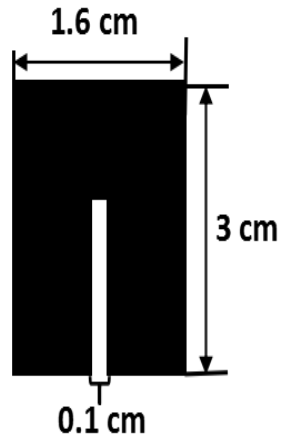

Fig. S11. Dimensions of one CNT-MC/BOPP actuator in the intelligent gripper.

Table. S1 Actuation performance of CNT-based actuators.

| Material                                                    | Size               | Curvature                        | Ref.                                |
|-------------------------------------------------------------|--------------------|----------------------------------|-------------------------------------|
| CNT-MC/BOPP                                                 | 2.5 cm × 0.5 cm    | 1.03 cm <sup>-1</sup>            | Our work                            |
| SWCNT-poly(N-isopropylacrylamide)/ low density polyethylene | 5 cm × 0.5 cm      | 0.62 cm <sup>-1</sup>            | Nano Lett. 2011, 11, 3239.          |
| Polycarbonate/CNT                                           | 2.5 cm in diameter | 0.4 cm <sup>-1</sup> in diameter | Nat. Commun. 2014, 5, 2983.         |
| ACNT/paraffin wax                                           | 2 cm × 0.4 cm      | 1.48 cm <sup>-1</sup>            | J. Am. Chem. Soc. 2016, 138, 225.   |
| CNT–boron nitride–epoxy                                     | 6 cm × 1 cm        | 1.04 cm <sup>-1</sup>            | Composites, Part B 2014, 62, 256.   |
| CNTs/polyvinylidene fluoride                                | 4 cm × 0.5 cm      | 0.6 cm <sup>-1</sup>             | Macromol. Mater. Eng. 2020, 2000502 |
